# Supplementary material for: Effect of Hydroxychloroquine on Lupus Activity, Preeclampsia and Intrauterine Growth Restriction in Pregnant Women with Systemic Lupus Erythematosus and/or Antiphospholipid Syndrome: A Systematic Review and Meta-Analysis
Source: MDPI journal article supplement (doi:10.3390/jcm12020485), 2023-01-06
Supplement: s1 [file s1]

Table S1: Search strategies

| Database: PubMed |                                                                                                                                                                                                                                                                             |
|------------------|-----------------------------------------------------------------------------------------------------------------------------------------------------------------------------------------------------------------------------------------------------------------------------|
| #                | Search date: Sept 11, 2022                                                                                                                                                                                                                                                  |
| 1                | ("Hydroxychloroquine"[Mesh] OR Hydroxychloroquine[tiab] OR Sinonteam[tiab] OR Woodcock[tiab] OR Plaquenil[tiab] OR Quineprox[tiab])                                                                                                                                         |
| 2                | ("Pregnancy"[Mesh] OR pregnan*[tiab])                                                                                                                                                                                                                                       |
| 3                | ("lupus erythematosus, systemic"[Mesh] OR "antiphospholipid syndrome"[Mesh] OR "antibodies, antiphospholipid"[Mesh])                                                                                                                                                        |
| 4                | 1 AND 2 AND 3                                                                                                                                                                                                                                                               |
| 5                | (animals[mh] NOT humans[mh])                                                                                                                                                                                                                                                |
| 6                | 4 NOT 5                                                                                                                                                                                                                                                                     |
| 7                | (clinical trial[pt] OR comparative study[pt] OR multicenter study[pt] OR validation studies[pt] OR cohort studies[mh] OR cross-over studies[mh] OR case-control studies[mh] OR follow-up studies[mh] OR cross-sectional studies[mh] OR (case reports[pt] AND series[tiab])) |
| 8                | 6 AND 7                                                                                                                                                                                                                                                                     |
| 9                | (review[pt] OR review[ti] OR comment[pt] OR editorial[pt] OR meta-analysis[pt] OR meta-analysis[ti] OR letter[pt] OR in vitro techniques[mh] OR news[pt] OR guideline[pt])                                                                                                  |
| 10               | 8 NOT 9                                                                                                                                                                                                                                                                     |
| 11               | 10 AND eng[la]                                                                                                                                                                                                                                                              |
| Database: Embase |                                                                                                                                                                                                                                                                             |
| #                | Search date: Sept 11, 2022<br>Segment used: 1974 to Sept 11, 2022                                                                                                                                                                                                           |
| 1                | *Hydroxychloroquine/ or (Hydroxychloroquine or Sinonteam or Woodcock or Plaquenil or Quineprox).ti,ab.                                                                                                                                                                      |
| 2                | exp pregnancy/ or (pregnan\$).ti,ab.                                                                                                                                                                                                                                        |
| 3                | 1 and 2                                                                                                                                                                                                                                                                     |
| 4                | exp systemic lupus erythematosus                                                                                                                                                                                                                                            |
| 5                | exp antiphospholipid syndrome                                                                                                                                                                                                                                               |
| 6                | exp antiphospholipid antibodies                                                                                                                                                                                                                                             |
| 7                | 4 or 5 or 6                                                                                                                                                                                                                                                                 |
| 8                | 3 and 7                                                                                                                                                                                                                                                                     |
| 9                | limit 8 to english language                                                                                                                                                                                                                                                 |
| 10               | 9 not ((exp animal/ or nonhuman/) not exp human/)                                                                                                                                                                                                                           |
| 11               | limit 10 to (yr="2012 -Current" and (conference abstract or conference proceeding or "conference review"))                                                                                                                                                                  |

|                                                                           |                                                                                                               |
|---------------------------------------------------------------------------|---------------------------------------------------------------------------------------------------------------|
| 12                                                                        | limit 10 to (article or conference paper)                                                                     |
| 13                                                                        | 11 or 12                                                                                                      |
| 14                                                                        | remove duplicates from 13                                                                                     |
| <b>Database: Cochrane Central Register of Controlled Trials (CENTRAL)</b> |                                                                                                               |
| <b>#</b>                                                                  | <b>Search date: Sept 11, 2022</b>                                                                             |
| 1                                                                         | [mh "Hydroxychloroquine"] or Hydroxychloroquine or Sinonteam or Woodcock or Plaquenil or Quineprox:ti,ab,kw   |
| 2                                                                         | [mh "Pregnancy"]or pregnan*:ti,ab,kw                                                                          |
| 3                                                                         | [mh "systemic lupus erythematosus"] or [mh "antiphospholipid syndrome"] or [mh "antiphospholipid antibodies"] |
| 4                                                                         | #1 and #2 and #3                                                                                              |
| 5                                                                         | #4 not (pubmed or embase):an                                                                                  |

Table S2: Standardized review protocol and study eligibility criteria based on the PICO framework

| Category                       | Inclusion criteria                                                                                                                                                           |
|--------------------------------|------------------------------------------------------------------------------------------------------------------------------------------------------------------------------|
| <b>Population</b>              | <ul style="list-style-type: none"> <li>Pregnant women with systemic lupus erythematosus, antiphospholipid syndrome or positive antiphospholipid antibodies</li> </ul>        |
| <b>Intervention</b>            | <ul style="list-style-type: none"> <li>Hydroxychloroquine</li> </ul>                                                                                                         |
| <b>Comparison</b>              | <ul style="list-style-type: none"> <li>Any</li> </ul>                                                                                                                        |
| <b>Outcome</b>                 | <ul style="list-style-type: none"> <li>High lupus activity (for SLE patients)</li> <li>Preeclampsia</li> <li>Intrauterine growth restriction</li> </ul>                      |
| <b>Study type</b>              | <ul style="list-style-type: none"> <li>Comparative studies (clinical trials and observational studies)</li> <li><u>Exclude:</u><br/>Non-comparative studies</li> </ul>       |
| <b>Language</b>                | <ul style="list-style-type: none"> <li>English</li> </ul>                                                                                                                    |
| <b>Publication date limits</b> | <ul style="list-style-type: none"> <li><b>Databases:</b> From inception to Sept 11, 2022</li> <li><b>Conferences Proceedings:</b> Past 10 years from 2012 to 2022</li> </ul> |

Table S3: Assessment of bias risk using Cochrane Collaboration's Tool

| Study            | Selection bias             |                        | Performance bias                       | Detection bias                 | Attrition bias          | Reporting bias      | Other bias            |
|------------------|----------------------------|------------------------|----------------------------------------|--------------------------------|-------------------------|---------------------|-----------------------|
|                  | Random sequence generation | Allocation concealment | Blinding of participants and personnel | Blinding of outcome assessment | Incomplete outcome data | Selective reporting | Other sources of bias |
| Levy, R. A. 2001 | Unclear risk               | Unclear risk           | Low risk                               | Unclear risk                   | Low risk                | Low risk            | Low risk              |

Table S4: Quality assessment of cohort/case-control studies using the Newcastle-Ottawa Scale

| Study                | Study design | Selection                                |                                     |                           |                                                       | Comparability                                                   | Outcome               |                                             |                                  | Final score |
|----------------------|--------------|------------------------------------------|-------------------------------------|---------------------------|-------------------------------------------------------|-----------------------------------------------------------------|-----------------------|---------------------------------------------|----------------------------------|-------------|
|                      |              | representativeness of the exposed cohort | selection of the non-exposed cohort | ascertainment of exposure | outcome of interest was not present at start of study | comparability of cohorts on the basis of the design or analysis | assessment of outcome | follow-up long enough for outcomes to occur | adequacy of follow up of cohorts |             |
| Clowse, M. E. 2006   | Cohort       | *                                        | *                                   | *                         | *                                                     | *                                                               | *                     | *                                           | *                                | 8           |
| Al Arfaj, A. S. 2010 | Cohort       | *                                        | *                                   | *                         | *                                                     | *                                                               | *                     | *                                           | *                                | 8           |
| Leroux, M. 2015      | Cohort       | *                                        | *                                   | *                         | *                                                     | **                                                              | *                     | *                                           | *                                | 9           |
| Sciascia, S. 2016    | Cohort       | *                                        | *                                   | *                         | *                                                     | *                                                               | *                     | *                                           | *                                | 8           |
| Kroese, S. J. 2017   | Cohort       | *                                        | *                                   | *                         | *                                                     | **                                                              | *                     | *                                           | *                                | 9           |
| Seo, M. R. 2019      | Cohort       | *                                        | *                                   | *                         | *                                                     | *                                                               | *                     | *                                           | *                                | 8           |
| Abd Rahman, R. 2020  | Cohort       | *                                        | *                                   | *                         | *                                                     | **                                                              | *                     | *                                           | *                                | 9           |
| Baalbaki, S. 2020    | Cohort       | *                                        | *                                   | *                         | *                                                     | **                                                              | *                     | *                                           | *                                | 9           |
| Do, S. C. 2020       | Cohort       | *                                        | *                                   | *                         | *                                                     | *                                                               | *                     | *                                           | *                                | 8           |
| Canti, V. 2021       | Cohort       | *                                        | *                                   | *                         | *                                                     | **                                                              | *                     | *                                           | *                                | 9           |
| Gerde, M. 2021       | Cohort       | *                                        | *                                   | *                         | *                                                     | **                                                              | *                     | *                                           | *                                | 9           |
| Liu, Y 2021          | Cohort       | *                                        | *                                   | *                         | *                                                     | *                                                               | *                     | *                                           | *                                | 8           |
| Liu, J 2022          | Cohort       | *                                        | *                                   | *                         | *                                                     | *                                                               | *                     | *                                           | *                                | 8           |

Table S5: Study characteristics and availability

|                      | Research type                       | Number of pregnancies | Study population | Treatment/Comparator Groups (n)                                                                                                                        | Outcomes reported                  |
|----------------------|-------------------------------------|-----------------------|------------------|--------------------------------------------------------------------------------------------------------------------------------------------------------|------------------------------------|
| Levy, R. A. 2001     | RCT, single center                  | 20                    | SLE, DLE         | a) HCQ (10)<br>b) placebo (10)                                                                                                                         | lupus activity                     |
| Clowse, M. E. 2006   | Prospective cohort, single center   | 257                   | SLE              | a) No HCQ (163)<br>b) HCQ (56)<br>c) HCQ stopped (38)                                                                                                  | lupus activity, IUGR               |
| Al Arfaj, A. S. 2010 | Retrospective study, single center  | 383                   | SLE              | a) Prednisolone (222)<br>b) Prednisolone + HCQ (69)<br>c) Prednisolone + azathioprine (30)<br>d) Prednisolone + azathioprine + HCQ (8)<br>e) None (54) | IUGR                               |
| Leroux, M. 2015      | Retrospective cohort, single center | 118                   | SLE              | a) HCQ (41)<br>b) no HCQ (77)                                                                                                                          | lupus activity, IUGR, preeclampsia |

|                     |                                     |     |      |                                                |                              |
|---------------------|-------------------------------------|-----|------|------------------------------------------------|------------------------------|
| Sciascia, S. 2016   | Retrospective cohort, single center | 170 | aPLs | a) HCQ (51)<br>b) no HCQ (119)                 | preeclampsia, IUGR           |
| Kroese, S. J. 2017  | Retrospective cohort, single center | 110 | SLE  | a) HCQ (30)<br>b) no HCQ (80)                  | lupus activity, preeclampsia |
| Seo, M. R. 2019     | Retrospective cohort, single center | 151 | SLE  | a) HCQ (80)<br>b) no HCQ (71)                  | preeclampsia                 |
| Abd Rahman, R. 2020 | Retrospective cohort, single center | 82  | SLE  | a) HCQ (47)<br>b) no HCQ (35)                  | IUGR, preeclampsia           |
| Baalbaki, S. 2020   | Retrospective cohort, single center | 77  | SLE  | a) HCQ (47)<br>b) no HCQ (30)                  | IUGR                         |
| Do, S. C. 2020      | Retrospective cohort, single center | 129 | SLE  | a) HCQ (53)<br>b) no HCQ (76)                  | preeclampsia, IUGR           |
| Canti, V. 2021      | Prospective cohort, single center   | 74  | SLE  | a) HCQ (45)<br>b) no HCQ (29)                  | preeclampsia, IUGR           |
| Gerde, M. 2021      | Retrospective cohort, single center | 101 | APS  | a) HCQ + LDA + LMWH (69)<br>b) LDA + LMWH (32) | IUGR, preeclampsia           |
| Liu, Y 2021         | Retrospective cohort, single center | 88  | SLE  | a) HCQ (44)<br>b) no HCQ (44)                  | preeclampsia                 |
| Liu, J 2022         | Retrospective cohort, single center | 96  | APS  | a) HCQ (59)<br>b) no HCQ (37)                  | IUGR, preeclampsia           |

SLE: systemic lupus erythematosus; DLE: discoid lupus erythematosus; HCQ: Hydroxychloroquine; APS: antiphospholipid syndrome; aPLs: antiphospholipid antibodies; IUGR: intrauterine growth restriction

Table S6: High lupus activity during pregnancy

|                    | HCQ (n/N)          | Comparison (n/N)                      | Criterion                |
|--------------------|--------------------|---------------------------------------|--------------------------|
| Levy, R. A. 2001   | HCQ: 0/10          | Placebo: 5/10                         | SLEDAI $\geq$ 4          |
| Clowse, M. E. 2006 | HCQ: 29/56         | no HCQ: 101/163<br>HCQ stopped: 32/38 | SLEDAI increase $\geq$ 3 |
| Leroux, M. 2015    | HCQ: 7/41          | no HCQ: 20/77                         | SLEDAI $\geq$ 4          |
| Kroese, S. J. 2017 | HCQ: 2/30          | no HCQ: 7/80                          | SLEDAI $\geq$ 4          |
| <b>Overall</b>     | <b>HCQ: 38/137</b> | <b>no HCQ: 133/330</b>                |                          |

Table S7: IUGR

|                      | HCQ (n/N)          | Comparison (n/N)                    |
|----------------------|--------------------|-------------------------------------|
| <b>SLE subgroup</b>  | <b>HCQ: 48/359</b> | <b>no HCQ: 116/656</b>              |
| Clowse, M. E. 2006   | HCQ: 11/49         | no HCQ: 29/157<br>HCQ stopped: 7/34 |
| Leroux, M. 2015      | HCQ: 4/41          | no HCQ: 22/77                       |
| Al Arfaj, A. S. 2010 | HCQ: 13/77         | no HCQ: 41/252                      |
| Abd Rahman, R. 2020  | HCQ: 6/47          | no HCQ: 10/35                       |
| Baalbaki, S. 2020    | HCQ: 1/47          | no HCQ: 3/30                        |
| Do, S. C. 2020       | HCQ: 9/53          | no HCQ: 3/76                        |
| Canti, V. 2021       | HCQ: 4/45          | no HCQ: 8/29                        |

| APS/aPLs subgroup | HCQ: 7/179         | no HCQ: 4/188          |
|-------------------|--------------------|------------------------|
| Sciascia, S. 2016 | HCQ: 0/51          | no HCQ: 2/119          |
| Gerde, M. 2021    | HCQ: 3/69          | no HCQ: 0/32           |
| Liu, J 2022       | HCQ: 4/59          | no HCQ: 2/37           |
| <b>Overall</b>    | <b>HCQ: 55/538</b> | <b>no HCQ: 120/844</b> |

Table S8: Result of sensitivity analysis for IUGR in SLE subgroup

| Removed study        | No. of pregnancies<br>(HCQ vs Control) | RR (95% CI) <sup>a</sup> | <i>I</i> <sup>2</sup> |
|----------------------|----------------------------------------|--------------------------|-----------------------|
| Clowse, M. E. 2006   | 310 vs 499                             | 0.72 [0.51, 1.03]        | 68%                   |
| Leroux, M. 2015      | 318 vs 579                             | 0.93 [0.68, 1.29]        | 65%                   |
| Abd Rahman, R. 2020  | 312 vs 621                             | 0.88 [0.64, 1.22]        | 68%                   |
| Al Arfaj, A. S. 2010 | 282 vs 404                             | 0.74 [0.51, 1.06]        | 70%                   |
| Baalbaki, S. 2020    | 312 vs 626                             | 0.84 [0.62, 1.15]        | 69%                   |
| Do, S. C. 2020       | 306 vs 580                             | 0.70 [0.50, 0.96]        | 54%                   |
| Canti, V. 2021       | 314 vs 627                             | 0.89 [0.64, 1.22]        | 66%                   |

<sup>a</sup>RR was calculated using fixed-effect model in sensitivity analysis

Table S9: Preeclampsia

|                          | HCQ (n/N)          | Comparison (n/N)      |
|--------------------------|--------------------|-----------------------|
| <b>SLE subgroup</b>      | <b>HCQ: 27/340</b> | <b>no HCQ: 64/412</b> |
| Leroux, M. 2015          | HCQ: 3/41          | no HCQ: 5/77          |
| Kroese, S. J. 2017       | HCQ: 2/30          | no HCQ: 9/80          |
| Seo, M. R. 2019          | HCQ: 6/80          | no HCQ: 14/71         |
| Abd Rahman, R. 2020      | HCQ: 2/47          | no HCQ: 5/35          |
| Do, S. C. 2020           | HCQ: 7/53          | no HCQ: 20/76         |
| Canti, V. 2021           | HCQ: 1/45          | no HCQ: 4/29          |
| Liu, Y 2021              | HCQ: 6/44          | no HCQ: 7/44          |
| <b>APS/aPLs subgroup</b> | <b>HCQ: 10/179</b> | <b>no HCQ: 14/188</b> |
| Sciascia, S. 2016        | HCQ: 1/51          | no HCQ: 8/119         |
| Gerde, M. 2021           | HCQ: 1/69          | no HCQ: 0/32          |
| Liu, J 2022              | HCQ: 8/59          | no HCQ: 6/37          |
| <b>Overall</b>           | <b>HCQ: 37/519</b> | <b>no HCQ: 78/600</b> |
